# Supplementary material for: Li+ solvation in glyme–Li salt solvate ionic liquids
Source: Royal Society of Chemistry journal article supplement (doi:10.1039/c4cp05943c), 2015-01-01
Supplement: c4cp05943c1.pdf [file c4cp05943c1.pdf]

**Supplementary Information:**

# **Li<sup>+</sup> Solvation in Glyme-Li Salt Solvate Ionic Liquids**

*Kazuhide Ueno,<sup>a</sup> Ryoichi Tatara,<sup>a</sup> Seiji Tsuzuki,<sup>b</sup> Sohi Saito,<sup>c</sup> Hiroyuki Doi,<sup>c</sup> Kazuki Yoshida,<sup>a</sup> Toshihiko Mandai,<sup>a</sup> Masaru Matsugami,<sup>d</sup> Yasuhiro Umebayashi,<sup>c</sup> Kaoru Dokko,<sup>a</sup> Masayoshi Watanabe<sup>\*a</sup>*

<sup>a</sup>Department of Chemistry and Biotechnology, Yokohama National University, 79-5 Tokiwadai,  
Hodogaya-ku, Yokohama 240-8501, Japan

<sup>b</sup>Research Initiative of Computational Sciences (RICS), Nanosystem Research Institute, National  
Institute of Advanced Industrial Science and Technology (AIST), 1-1-1 Umezono, Tsukuba, Ibaraki  
305-8568, Japan

<sup>c</sup>Graduate School of Science and Technology, Niigata University, 8050 Ikarashi, 2-no-cho, Nishi-ku,  
Niigata City, 950-2181, Japan

<sup>d</sup>Faculty of Liberal Studies, Kumamoto National College of Technology, 2659-2 Suya, Koshi,  
Kumamoto 861-1102, Japan

AUTHOR EMAIL ADDRESS: [mwatanab@ynu.ac.jp](mailto:mwatanab@ynu.ac.jp)

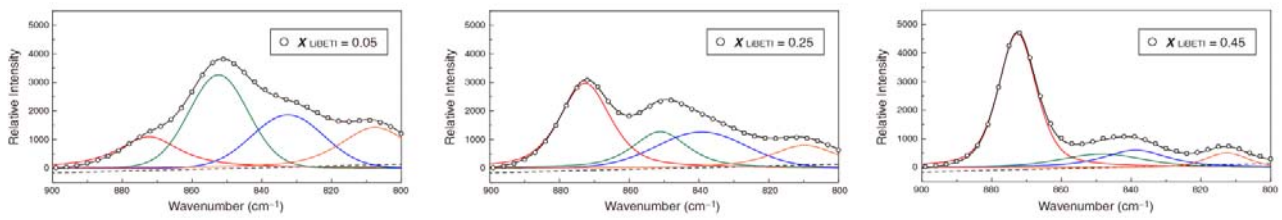

**Figure S1.** Typical results on the deconvolutions of Raman spectra into four bands at around 810, 835, 850, and 873  $\text{cm}^{-1}$ , by the Gaussian-Lorentzian function.

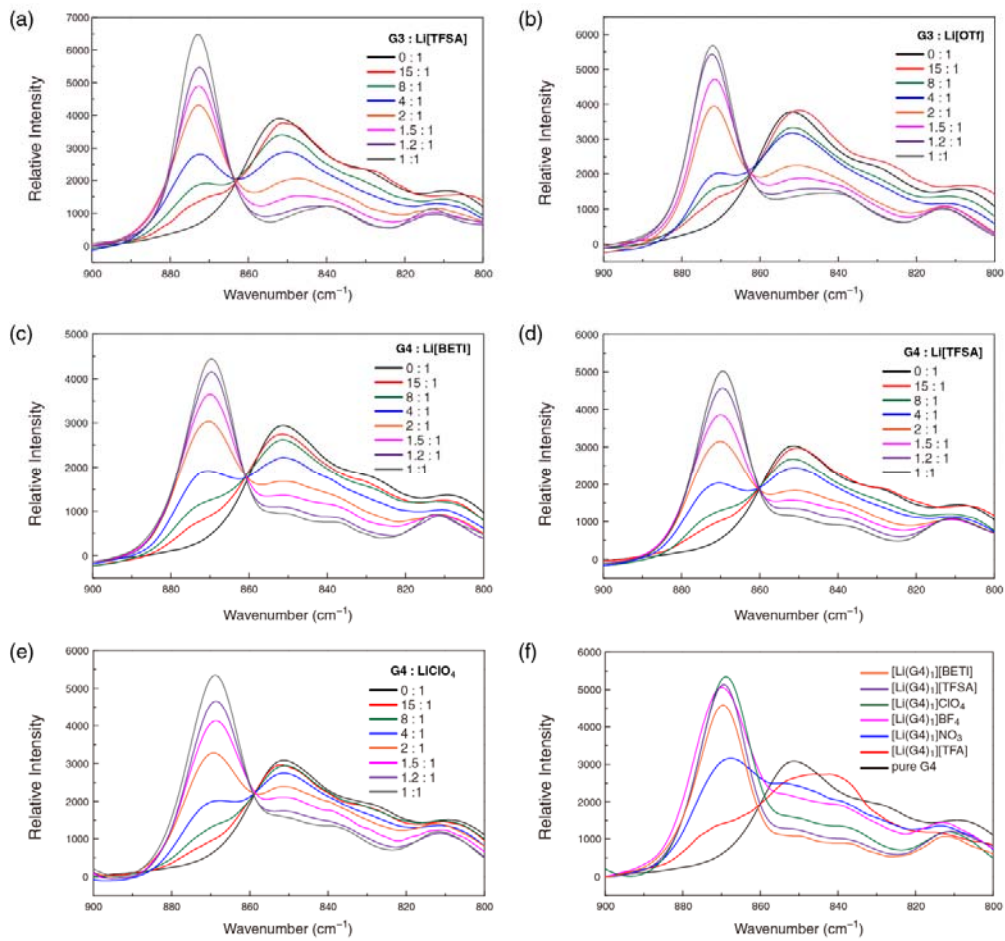

**Figure S2.** Normalized Raman spectra of (a) G3-Li[TFSA] mixtures, (b) G3-Li[OTf] mixtures, (c) G4-Li[BETI] mixtures, (d) G4-Li[TFSA] mixtures, (e) G4-LiClO<sub>4</sub> mixtures, and (f) [Li(G4)<sub>1</sub>]X.

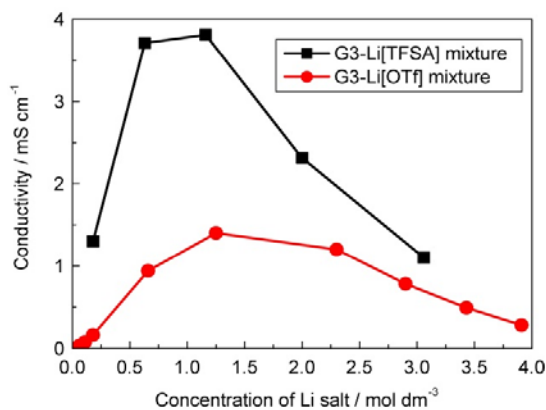

**Figure S3.** Ionic conductivity plotted against Li salt concentration in the G3-Li[TFSA] and the G3-Li[OTf] mixtures at 30 °C.

### Electrode potentials of Li/Li<sup>+</sup>.

The electrode potential  $E_2$  was calculated by the following procedure, with  $c_f$  values obtained from Raman spectroscopic analysis (Table S1).

**Table S1.** Estimated value of concentration of free G3 in [Li(G3)<sub>n</sub>][TFSA] at 30 °C by Raman study.

|                                | $c_f$ (mol%) | $c_f$ (mol dm <sup>-3</sup> ) |
|--------------------------------|--------------|-------------------------------|
| [Li(G3) <sub>1</sub> ][TFSA]   | 2.3          | 0.071                         |
| [Li(G3) <sub>1.2</sub> ][TFSA] | 17           | 0.58                          |
| [Li(G3) <sub>1.5</sub> ][TFSA] | 22           | 0.78                          |
| [Li(G3) <sub>2</sub> ][TFSA]   | 35           | 1.4                           |
| [Li(G3) <sub>4</sub> ][TFSA]   | 65           | 3.0                           |

The potential  $E_2^{0'}$  of the reference electrode, Li/Li<sup>+</sup> in 1 mol dm<sup>-3</sup> Li[TFSA]/G3 (= [Li(G3)<sub>4.8</sub>][TFSA]) can be written as:

$$E_2^{0'} = E_2^0 + \frac{2.303RT}{F} \log \frac{1}{3.8} = 0 \quad (S1)$$

$$\Leftrightarrow E_2^0 = E_2^{0'} + \frac{2.303RT}{F} \log 3.8$$

Substituting Eq. S1 in Eq. 7, we get:

$$E_2 = E_2^{0'} + \frac{2.303RT}{F} \log 3.8 + \frac{2.303RT}{F} \log \frac{a_{[\text{Li}(\text{glyme})]^+}}{a_{\text{glyme}}} \quad (\text{S2})$$

where  $E_2^{0'}$  is 0, because it represents the reference electrode potential. Thus, we can calculate  $E_2$  by substituting  $a_{[\text{Li}(\text{glyme})]^+} = c_{\text{Li}}$  and  $a_{\text{glyme}} = c_{\text{G}^-} c_{\text{Li}}$  in the dilute solutions ( $c_{\text{Li}} \leq 1 \text{ mol dm}^{-3}$  for G3-Li[TFSA] mixtures), and  $a_{[\text{Li}(\text{glyme})]^+} = c_{\text{Li}}$ ,  $a_{\text{glyme}} = c_{\text{f}}$  in the concentrated regime ( $c_{\text{Li}} > 1 \text{ mol dm}^{-3}$ ) in **Figure 9**.

Although we assume  $a_{\text{Li}^+} (= a_{[\text{Li}(\text{glyme})]^+}) = c_{\text{Li}}$  for the sake of simplicity, the activities can indeed be represented as  $a_{\text{Li}^+} (= a_{[\text{Li}(\text{glyme})]^+}) = c_{\text{Li}} \gamma_{\text{Li}}$  with the activity coefficient of  $\text{Li}^+$  ( $\gamma_{\text{Li}}$ ). If the activity coefficient is taken into consideration, the Nernst equation of the electrode reaction;  $\text{Li}^+ + \text{e}^- \rightleftharpoons \text{Li}$ , can be modified as:

$$\begin{aligned} E_1 &= E_1^0 + \frac{2.303RT}{F} \log a_{\text{Li}^+} \\ &= E_1^0 + \frac{2.303RT}{F} \log \gamma_{\text{Li}} + \frac{2.303RT}{F} \log c_{\text{Li}} \end{aligned} \quad (\text{S3})$$

The electrode potential ( $E_1^{0'}$ ) in the reference solution of  $c_{\text{Li}} = 1 \text{ mol dm}^{-3}$  with the activity coefficient ( $\gamma_{\text{Li}, 1\text{M}}$ ) can be written as:

$$\begin{aligned} E_1^{0'} &= E_1^0 + \frac{2.303RT}{F} \log \gamma_{\text{Li}, 1\text{M}} (= 0) \\ \Leftrightarrow E_1^0 &= E_1^{0'} - \frac{2.303RT}{F} \log \gamma_{\text{Li}, 1\text{M}} \end{aligned} \quad (\text{S4}).$$

Substituting Eq. S4 in Eq. S3, we obtain:

$$E_1 = E_1^{0'} + \frac{2.303RT}{F} \log \frac{\gamma_{\text{Li}}}{\gamma_{\text{Li}, 1\text{M}}} + \frac{2.303RT}{F} \log c_{\text{Li}} \quad (\text{S5})$$

In Eq. S5, the first term ( $E_1^{0'}$ ) is 0 because  $\text{Li}/\text{Li}^+$  in  $1 \text{ mol dm}^{-3}$  Li[TFSA]/G3 is the reference electrode, the second term represents the error caused by the variation of activity coefficient with  $\text{Li}^+$  concentration, and the third term is a calculable value. Thus, the difference between experimental and calculated values of the electrode potential originated from the second term. **Figure S4** indicates that the

activity coefficient ( $\gamma_{\text{Li}}$ ) was a little higher than that of the  $1 \text{ mol dm}^{-3}$  in the lower concentration region ( $< 1 \text{ mol dm}^{-3}$ ). In the highly concentrated regime, the drastic increase in the electrode potential can also be described by the second term with the activity coefficients in Eq. S5.

In the case of  $[\text{Li}(\text{G3})][\text{TFSA}]$ , for example, the experimental data for  $\text{Li}/\text{Li}^+$  electrode potential is  $0.230 \text{ V}$ , whereas the calculated value is  $0.029 \text{ V}$  based on Eq. 6,  $E = \frac{2.303RT}{F} \log c_{\text{Li}}/F$  (**Figure S4**). If the interpretation of the difference between the experimental and calculated values ( $0.201 \text{ V}$ ) was imposed to the second term in Eq. S5,  $\gamma_{\text{Li}}$  must be 2176 times higher than  $\gamma_{\text{Li}, 1\text{M}}$ . However, physical meaning of the significantly high  $\gamma_{\text{Li}}$  is obscure. Instead, we attempted to explain the drastic potential change by considering the activity of the free glymes without imposing the compensation of the activity coefficients.

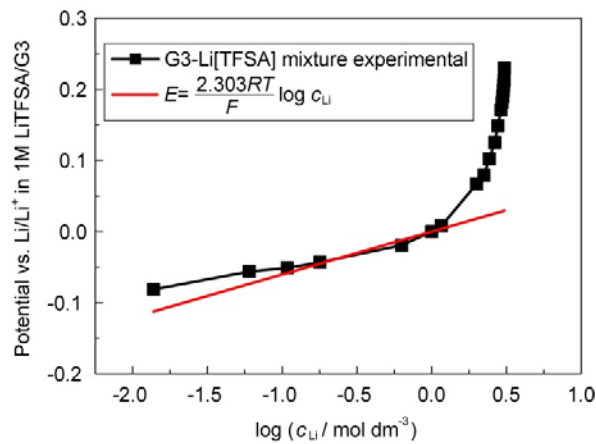

**Figure S4.** Plots of the experimental and calculated (based on Nernst Equation) value of  $\text{Li}/\text{Li}^+$  electrode potential against common logarithm of the Li salt concentration in  $[\text{Li}(\text{G3})_n][\text{TFSA}]$  at  $30 \text{ }^\circ\text{C}$ . Reference electrode was  $\text{Li}/\text{Li}^+$  in  $1 \text{ mol dm}^{-3}$   $\text{Li}[\text{TFSA}]/\text{G3}$ .

For the modified electrode reaction accompanied by de-solvation process,  $[\text{Li}(\text{glyme})]^+ + e^- \rightleftharpoons \text{Li} + \text{glyme}$ , Nernst equation with the activity coefficients of  $[\text{Li}(\text{glyme})]^+$  ( $\gamma_{[\text{Li}(\text{glyme})]^+}$ ) and glyme ( $\gamma_{\text{glyme}}$ ) can be modified as follows:

$$\begin{aligned}
E_2 &= E_2^0 + \frac{2.303RT}{F} \log \frac{a_{[\text{Li}(\text{glyme})]^+}}{a_{\text{glyme}}} \\
&= E_2^0 + \frac{2.303RT}{F} \log \frac{\gamma_{[\text{Li}(\text{glyme})]^+}}{\gamma_{\text{glyme}}} + \frac{2.303RT}{F} \log \frac{c_{[\text{Li}(\text{glyme})]^+}}{c_f}
\end{aligned} \tag{S6}$$

The electrode potentials ( $E_2^0$ ) in the reference solution with  $c_{[\text{Li}(\text{G3})]^+} = 1 \text{ mol dm}^{-3}$ , and  $c_{\text{glyme}} = 3.8 \text{ mol dm}^{-3}$  are;

$$\begin{aligned}
E_2^{0'} &= E_2^0 + \frac{2.303RT}{F} \log \frac{\gamma_{[\text{Li}(\text{G3})]^+, 1\text{M}}}{\gamma_{\text{G3 free}, 3.8\text{M}}} - \frac{2.303RT}{F} \log 3.8 (= 0) \\
\Leftrightarrow E_2^0 &= E_2^{0'} - \frac{2.303RT}{F} \log \frac{\gamma_{[\text{Li}(\text{G3})]^+, 1\text{M}}}{\gamma_{\text{G3 free}, 3.8\text{M}}} + \frac{2.303RT}{F} \log 3.8
\end{aligned} \tag{S7}$$

Substituting Eq. S7 in Eq. S6, we obtain:

$$E_2 = E_2^{0'} + \frac{2.303RT}{F} \log \frac{\gamma_{[\text{Li}(\text{glyme})]^+}}{\gamma_{[\text{Li}(\text{G3})]^+, 1\text{M}}} + \frac{2.303RT}{F} \log \frac{\gamma_{\text{G3 free}, 3.8\text{M}}}{\gamma_{\text{glyme}}} + \frac{2.303RT}{F} \log 3.8 + \frac{2.303RT}{F} \log \frac{c_{[\text{Li}(\text{glyme})]^+}}{c_f} \tag{S8}$$

In Eq. S8, the first term is 0 because Li/Li<sup>+</sup> in 1 mol dm<sup>-3</sup> Li[TFSA]/G3 is reference electrode, the second and third terms represent the error caused by the change in the activity coefficients of the complex cation and the free glymes against Li<sup>+</sup> concentration, the fourth term is constant, and the fifth term is a calculable value. The drastic increase in the potential at high concentrations can be explained by the fifth term as  $c_{\text{G3 free}}$  in the denominator. However, the difference between experimental and calculated values in **Figure 9** could originate from the second and third terms, as well as Eq. S5.
